# Supplementary material for: Early and late cyanobacterial bloomers in a shallow, eutrophic lake
Source: Royal Society of Chemistry journal article supplement (doi:10.1039/d2em00078d), 2022-01-01
Supplement: d2em00078d1.pdf [file d2em00078d1.pdf]

## Supporting Information for

### **Early and late cyanobacterial bloomers in a shallow, eutrophic lake**

K. J. Painter<sup>1</sup>, J. J. Venkiteswaran<sup>2</sup>, D. F. Simon<sup>3</sup>, Sung Vo Duy<sup>3</sup>, S. Sauvé<sup>3</sup>, and H. M. Baulch<sup>1</sup>

<sup>1</sup> School of Environment and Sustainability, Global Institute for Water Security, University of Saskatchewan, Saskatoon, SK S7N 5C8, Canada

<sup>2</sup> Department of Geography and Environmental Studies, Wilfrid Laurier University, Waterloo, ON N2L 3C5, Canada

<sup>3</sup> Department of Chemistry, Université de Montréal, Montréal, QC H2V 0B3, Canada

### **Contents of this file**

Text S1 to S3

Figures S1 to S4

Tables S1 to S2

### **Introduction**

This document contains additional text, figures and tables that support the analysis and results reported in the manuscript. Texts S1 to S3 describe additional details about the analysis of cyanotoxins and nutrients. Figures show cyanobacterial biomass by species (Figure S1), the relationships between dominant cyanobacterial biomass and chl-*a* (Figure S2), nutrient concentrations (Figure S3), and detailed water temperature measurements (Figure S4). The supplemental tables include the individual analyte detection and quantification limits for cyanotoxins (Table S1) and the full results of the indicator species analysis referenced in the main manuscript text (Table S2). Figures were created in R and tables in MS Excel. Associated code and data are available from: [https://github.com/biogeochem/buffalopound\\_blooms](https://github.com/biogeochem/buffalopound_blooms).

### **Text S1. Chemicals and standards for cyanotoxin analysis**

Cyanotoxins standards were purchased from Enzo Life Sciences (Farmingdale, NY, USA: dmMC-RR, MC-RR, MC-YR, MC-LA, MC-LY, MC-LW, MC-LF, MC-WR, MC-HtyR and MC-HilR ), the National Research Council of Canada (Halifax, NS, Canada: ANA-a, CYN, MC-LR and dmMC-LR), Cyano Biotech GmbH (Berlin, Germany: AP-A and AP-B), and Abraxis Eurofins (Warminster, PA, USA: HANA-a). The isotope-labelled internal standards ANA-a-<sup>13</sup>C<sub>4</sub> and CYN-<sup>15</sup>N<sub>5</sub> were purchased from Abraxis Eurofins, while MC-LR-<sup>15</sup>N<sub>10</sub> was from Cambridge Isotopes Laboratories, Inc. (Tewksbury, MA, USA). Isotopically labelled D<sub>3</sub>-MMPB was from the National Research Council of Canada (Halifax, Nova Scotia, Canada) (D<sub>3</sub>-MMPB originally from Wako Pure Chemicals Industries, Ltd). All chemical reagents were obtained from Millipore Sigma (Oakville, ON, Canada) and HPLC grade solvents from Fisher Scientific (Whitby, ON, Canada).

### **Text S2. Instrumentation for cyanotoxin analysis**

For MC total analysis, a 5-mL aliquot of the water was retrieved and filtered through GHP. A 2-mL aliquot of the filtrate was then spiked with internal standard (d<sub>3</sub>-MMPB) and subject to Lemieux-von Rudloff oxidation, which generates the MMPB moiety from permanganate oxidation (Munoz et al. 2017). Samples were submitted to on-line solid phase extraction (SPE) ultra-high performance liquid chromatography (UHPLC) coupled to tandem mass spectrometry (Thermo TSQ Quantiva). The UHPLC instrument consisted of a loading pump (Accela 600, Thermo Fisher, San Jose, CA, USA) and an analytical pump (Accela 1250, Thermo Fisher). The SPE column and the analytical column were with Hypersil Gold C18 selectivity (Thermo Fisher) with dimensions of 20x2.1mm; 12µm particle size and 50x2.1mm; 1.9µm particle size, respectively.

For specific analysis of 17 individual cyanotoxins, a 5-mL aliquot of the water was retrieved and filtered through GH polypropylene. A 2-mL aliquot of the filtrate was then spiked with internal standards and analyzed by on-line SPE-UHPLC high-resolution mass spectrometry (Thermo Orbitrap Q-Exactive). Though only one replicate was analyzed per time point, the analytical method had been previously validated for accuracy and precision through lake water matrix spikes, as detailed in Roy-Lachapelle et al. (2019). A Thermo Scientific Dionex UltiMate LPG-3400SD pump was used for on-line SPE enrichment and a Thermo Scientific Dionex UltiMate HPG-3400RS pump for the analytical separation. A Hypersil Gold aQ C18 (20x2.1mm; 12µm particle size) and a Hypersil Gold C18 (100x2.1mm; 1.9µm particle size) were used as SPE and analytical columns, respectively. Orbitrap acquisition parameters were optimized as described elsewhere (Roy-Lachapelle et al. 2019).

### **Text S3. Methods for nutrient analyses**

Nutrients including soluble reactive P (SRP), ammonium (as NH<sub>3</sub> + NH<sub>4</sub><sup>+</sup>) and nitrate (as NO<sub>2</sub><sup>-</sup> + NO<sub>3</sub><sup>-</sup>) were analyzed at the Saskatchewan Water Chemistry and Ecology laboratory at the University of Saskatchewan Global Institute for Water Security in

Saskatoon, Canada. Samples were filtered through a 0.45 µm nylon syringe-tip filter and frozen until time of analysis. Ammonium samples were preserved additionally with sulfuric acid prior to storage. Samples were analyzed using a SmartChem 170 discrete chemical analyzer (Westco Scientific, USA) using standard EPA methods (SRP, EPA Method PHO-001-A; ammonium, EPA Method AMM-001-A; nitrate, EPA Method NO3-01). Method detection limits were 1.8 µg P/L, 5.0 µg N/L, and 4.4 µg N/L for SRP, ammonium, and nitrate, respectively.

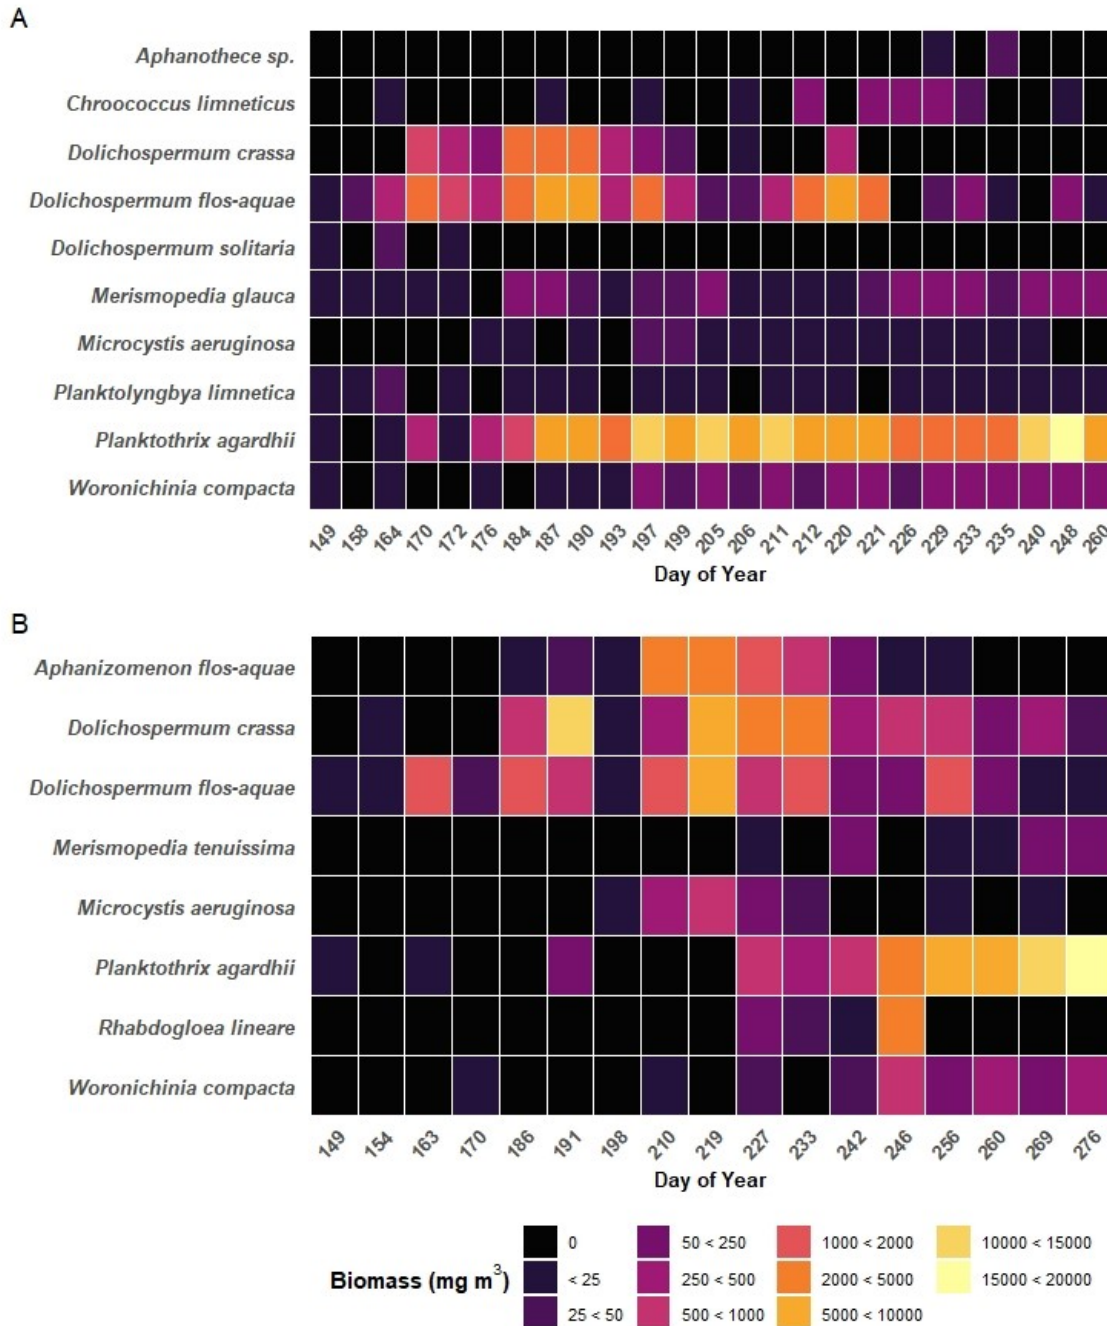

**Figure S1.** Biomass ( $\text{mg/m}^3$ ) of cyanobacterial phytoplankton species identified ( $n = 10$  in 2018;  $n = 8$  in 2019) from samples collected from the 0.8 m depth of Buffalo Pound Lake, Saskatchewan in 2018 (A) and 2019 (B)

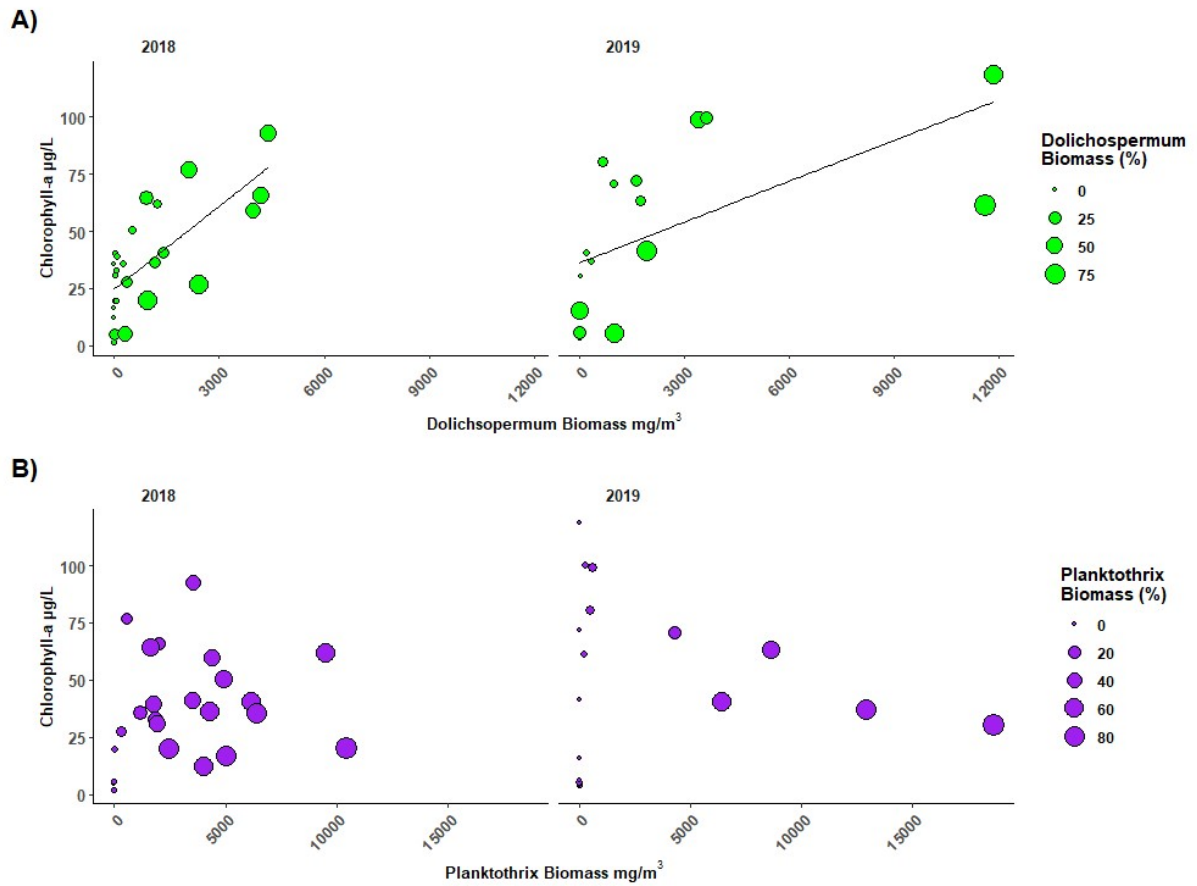

**Figure S2.** Relationships between biomass ( $\text{mg/m}^3$ ) of dominant cyanobacterial genera A) *Dolichospermum* and B) *Planktothrix* and chlorophyll-*a* (chl-*a*) in samples collected from the 0.8 m depth of Buffalo Pound Lake, Saskatchewan in 2018 and 2019. Point size represents % contribution of each genus to total phytoplankton biomass. Significant correlations between *Dolichospermum* and chl-*a* are indicated by a line of best fit in 2018 ( $p < 0.001$ , Spearman's  $\rho = 0.66$ ) and 2019 ( $p < 0.001$ , Spearman's  $\rho = 0.80$ ).

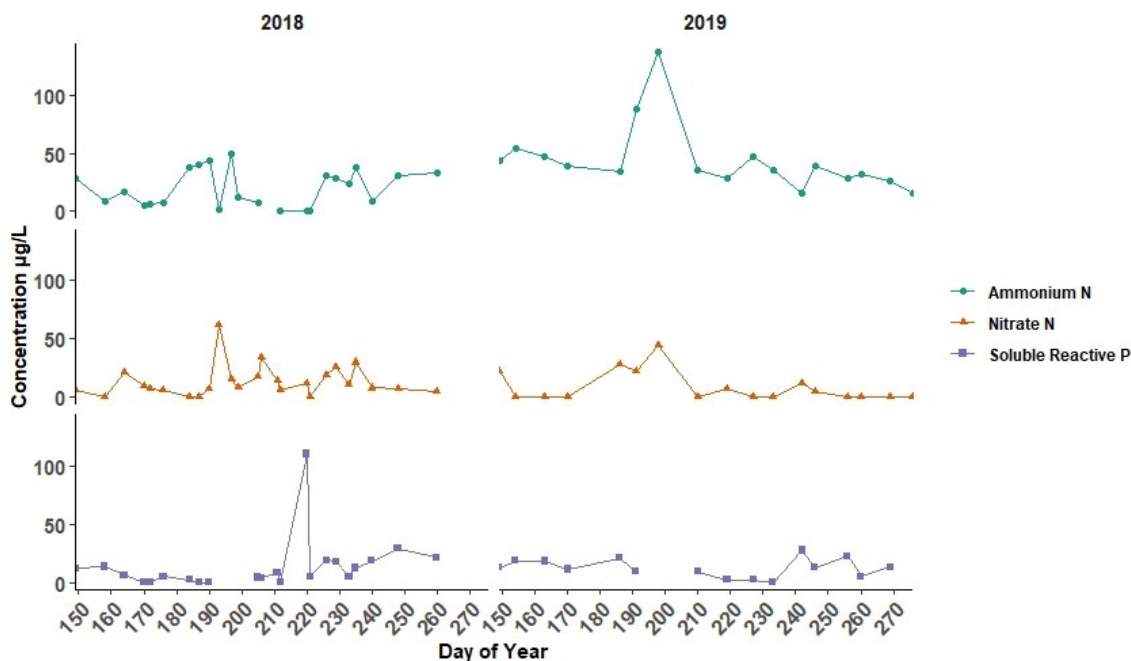

**Figure S3.** Concentrations of ammonium (as  $\text{NH}_3 + \text{NH}_4^+$ ;  $\mu\text{g N/L}$ ), nitrate (as  $\text{NO}_2^- + \text{NO}_3^-$ ;  $\mu\text{g N/L}$ ) and soluble reactive phosphorus ( $\mu\text{g P/L}$ ) in water collected from the 0.8 m depth of Buffalo Pound Lake, Saskatchewan in 2018 and 2019.

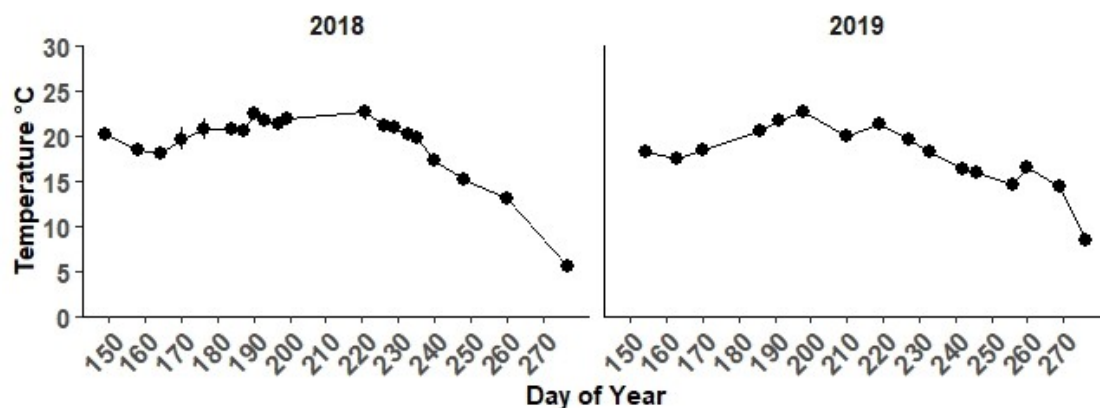

**Figure S4.** Mean water temperature in Buffalo Pound Lake, Saskatchewan in 2018 and 2019; vertical lines indicate standard deviation around the mean (n = 19; measured from depths in 0.2 m increments).

**Table S1.** Analytical levels of detection and quantification (ng/L) of cyanometabolites analyzed from samples collected from 0.8 m depth in Buffalo Pound Lake, Saskatchewan in 2018 and 2019

| Analyzed Metabolite | Text Abbreviation | Level of Detection (ng/L) |               | Level of Quantification (ng/L) |               |
|---------------------|-------------------|---------------------------|---------------|--------------------------------|---------------|
|                     |                   | Intracellular             | Extracellular | Intracellular                  | Extracellular |
| Total Microcystins  | MC Total          | 1                         | 5             | 2                              | 15            |
| Cylindrospermopsin  | CYN               | 2                         | 41            | 5                              | 135           |
| Anatoxin-a          | ANA-a             | 1                         | 18            | 2                              | 59            |
| dmMicrocystin-RR    | dmMC-RR           | 0                         | 5             | 1                              | 17            |
| Microcystin-RR      | MC-RR             | 0                         | 11            | 1                              | 37            |
| Microcystin-YR      | MC-YR             | 0                         | 10            | 1                              | 34            |
| Microcystin-HtyR    | MC-HtyR           | 1                         | 27            | 4                              | 88            |
| Microcystin-LR      | MC-LR             | 1                         | 15            | 2                              | 49            |
| dmMicrocystin-LR    | dmMC-LR           | 0                         | 9             | 1                              | 30            |
| Microcystin-HiIR    | MC-HiIR           | 1                         | 14            | 2                              | 45            |
| Microcystin-WR      | MC-WR             | 1                         | 37            | 5                              | 123           |
| Microcystin-LA      | MC-LA             | 0                         | 10            | 1                              | 32            |
| Microcystin-LY      | MC-LY             | 1                         | 29            | 4                              | 97            |
| Microcystin-LW      | MC-LW             | 0                         | 8             | 1                              | 27            |
| Microcystin-LF      | MC-LF             | 0                         | 9             | 1                              | 31            |
| Homoanatoxin-a      | HANA-a            | 0                         | 12            | 2                              | 39            |
| Anabaenopeptin A    | AP-A              | 1                         | 20            | 3                              | 67            |
| Anabaenopeptin B    | AP-B              | 0                         | 6             | 1                              | 19            |

**Table S2.** Results of indicator species analysis on groups including combinations for the 2018 and 2019 phytoplankton community collected from 0.8 m depth in Buffalo Pound Lake, Saskatchewan

|      | Group | Species                           | IndVal | p-value |
|------|-------|-----------------------------------|--------|---------|
| 2018 | A     | <i>Dinobryon sertularia</i>       | 0.944  | 0.011   |
|      |       | <i>Monoraphidium minutum</i>      | 0.857  | 0.038   |
|      |       | Large chrysophyte spp.            | 0.828  | 0.034   |
|      | B     | <i>Dolichospermum crassa</i>      | 0.931  | 0.001   |
|      | C     | <i>Woronichinia compacta</i>      | 0.963  | 0.001   |
|      | A + B | <i>Actinastrum</i> sp.            | 0.816  | 0.044   |
|      | A + C | Small chrysophyte spp.            | 0.917  | 0.043   |
|      | B + C | <i>Planktothrix agardhii</i>      | 1.000  | 0.009   |
|      |       | <i>Peridinium goslaviense</i>     | 0.975  | 0.017   |
|      |       | <i>Scenedesmus quadricauda</i>    | 0.975  | 0.010   |
|      |       | <i>Selenastrum copricornutum</i>  | 0.972  | 0.014   |
|      |       | <i>Dictyosphaerium pulchellum</i> | 0.960  | 0.021   |
|      |       | <i>Fragilaria capucina</i>        | 0.956  | 0.024   |
|      |       | <i>Cryptomonas erosa</i>          | 0.951  | 0.035   |
|      |       | <i>Cyclotella michiganiana</i>    | 0.944  | 0.014   |
| 2019 | A     | <i>Dinobryon sertularia</i>       | 1.000  | 0.001   |
|      |       | <i>Asterionella formosa</i>       | 1.000  | 0.002   |
|      |       | <i>Cryptomonas reflexa</i>        | 0.866  | 0.006   |
|      | B     | <i>Aphanizomenon flos-aquae</i>   | 0.997  | 0.001   |
|      |       | <i>Ceratium hirundinella</i>      | 0.890  | 0.030   |
|      | C     | <i>Planktothrix agardhii</i>      | 0.990  | 0.001   |
|      |       | <i>Woronichinia compacta</i>      | 0.984  | 0.001   |
|      |       | <i>Dictyosphaerium pulchellum</i> | 0.972  | 0.003   |
|      |       | <i>Euglena acus</i>               | 0.951  | 0.001   |
|      |       | <i>Selenastrum copricornutum</i>  | 0.872  | 0.010   |
|      |       | <i>Stephanodiscus niagarae</i>    | 0.869  | 0.009   |
|      |       | <i>Scenedesmus quadricauda</i>    | 0.858  | 0.038   |
|      |       | <i>Closterium kuetzingii</i>      | 0.845  | 0.006   |
|      |       | <i>Merismopedia tenuissima</i>    | 0.834  | 0.017   |
|      |       | <i>Closterium</i> sp.             | 0.743  | 0.024   |
|      | A + B | <i>Salpingoeca frequentissima</i> | 0.866  | 0.022   |
|      | B + C | <i>Dolichospermum crassa</i>      | 1.000  | 0.001   |
|      |       | <i>Aulacoseira italica</i>        | 0.96   | 0.044   |
|      |       | <i>Pediastrum duplex</i>          | 0.953  | 0.034   |
